# Supplementary material for: The radicalversusionic mechanisms of reduced cobalamin inactivation bytert-butyl hydroperoxide and hydrogen peroxide in aqueous solution
Source: Royal Society of Chemistry journal article supplement (doi:10.1039/d0nj04231e), 2020-11-04
Supplement: d0nj04231e1.pdf [file d0nj04231e1.pdf]

**Electronic Supplementary Information for:**  
**The radical versus ionic mechanisms of reduced cobalamins inactivation by tert-butyl hydroperoxide and hydrogen peroxide in aqueous solution**

**Denis S. Salnikov<sup>\*</sup>, Sergei V. Makarov, Oscar I. Koifman**

*Department of Food Chemistry, State University of Chemistry and Technology,  
Sheremetevskiy str. 7, Ivanovo, 153000, Russia*  
**densal@isuct.ru**

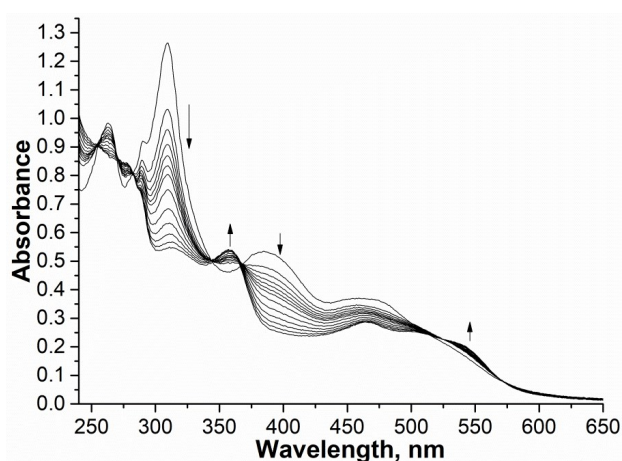

Fig. S1 UV-Vis spectra recorded during the reaction between SO<sub>2</sub>-Cbl(II) and hydrogen peroxide in aqueous solution (the *first step*): [SO<sub>2</sub>-Cbl(II)] = 5.0 × 10<sup>-5</sup> M, [H<sub>2</sub>O<sub>2</sub>] = 0.14 × 10<sup>-3</sup> M, pH 7.4, 25 °C, anaerobic conditions

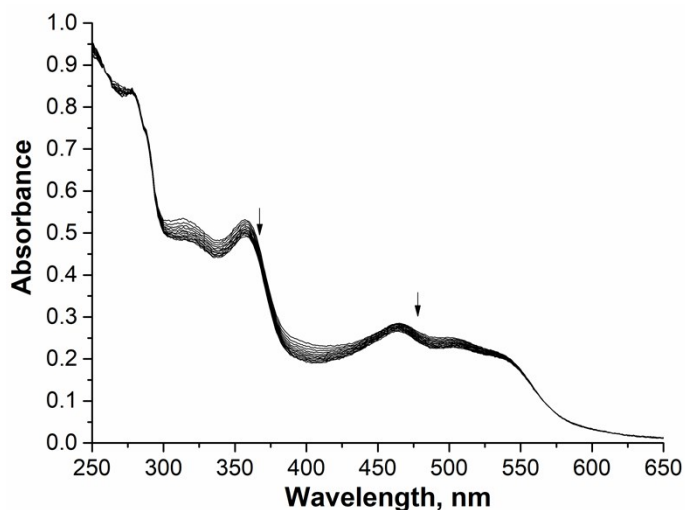

Fig. S2 UV-Vis spectra recorded during the reaction between SO<sub>2</sub>-Cbl(II) and hydrogen peroxide in aqueous solution (the *second step*): [SO<sub>2</sub>-Cbl(II)] = 5.0 × 10<sup>-5</sup> M, [H<sub>2</sub>O<sub>2</sub>] = 0.14 × 10<sup>-3</sup> M, pH 7.4, 25 °C, anaerobic conditions

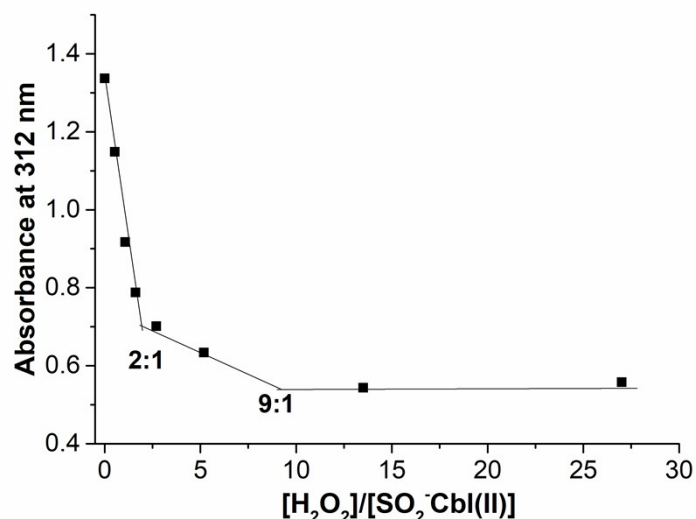

Fig. S3 Plots of absorbance at 312 nm *versus*  $[H_2O_2]/[SO_2-Cbl(II)]$  in aqueous media:  $[SO_2-Cbl(II)] = 5.0 \times 10^{-5}$  M, pH 7.4, 25 °C, anaerobic conditions

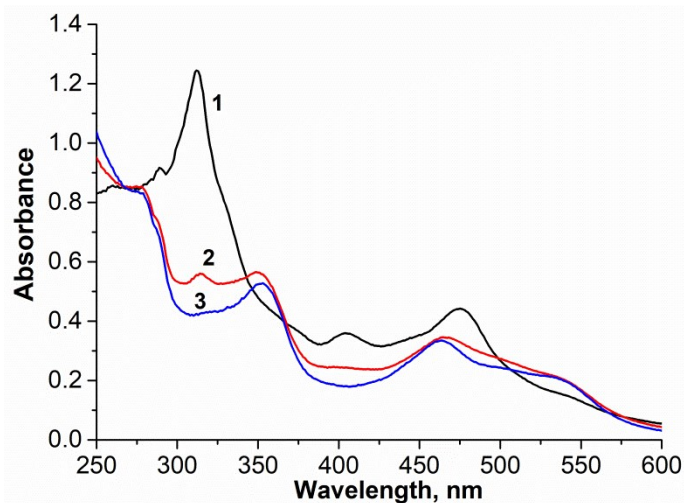

Fig. S4 UV-Vis spectra recorded during the reaction between Cbl(II) and hydrogen peroxide in aqueous solution: 1 – starting Cbl(II), 2 – product of the first step of the reaction, 3 – product of the second step of the reaction:  $[Cbl(II)] = 5.0 \times 10^{-5}$  M,  $[H_2O_2] = 0.14 \times 10^{-3}$  M, pH 7.4, 25 °C

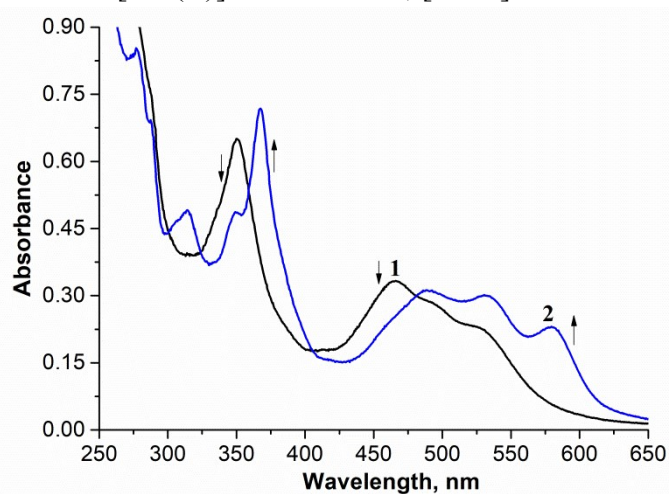

Fig. S5 UV-Vis spectra recorded before (1) and after (2) addition of an excess of sodium cyanide to product of the reaction of Cbl(II) with  $H_2O_2$  in aqueous solution:  $[Cbl(II)] = 5.0 \times 10^{-5}$  M,  $[H_2O_2] = 0.26 \times 10^{-3}$  M,  $[NaCN] = 0$  (1),  $140 \times 10^{-3}$  (2) M pH 7.4, 25 °C, anaerobic conditions.

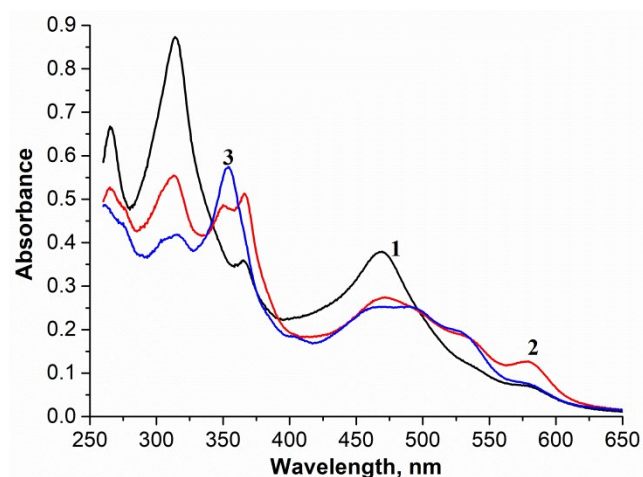

Fig. S6 UV-Vis spectral changes registered during the reaction between Cbi(II) and hydrogen peroxide: 1 – starting Cbi(II), 2 – product of the first step of the reaction, 3 – product of the second step of the reaction:  $[\text{Cbi(II)}] = 5.0 \times 10^{-5} \text{ M}$ ,  $[\text{H}_2\text{O}_2] = 0.1 \times 10^{-3} \text{ M}$ , pH 7.4, 25 °C, anaerobic conditions

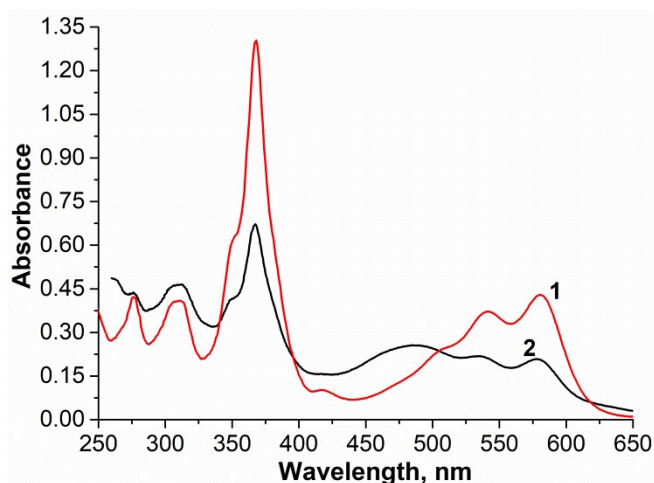

Fig. S7 UV-Vis spectra of dicyanocobinamide (1) and product of the reaction of Cbi(II) with H<sub>2</sub>O<sub>2</sub>, recorded after addition of an excess of sodium cyanide (2):  $[(\text{CN})_2\text{Cbi}] = [\text{Cbi(II)}] = 4.3 \times 10^{-5} \text{ M}$ ,  $[\text{H}_2\text{O}_2] = 0.26 \times 10^{-3} \text{ M}$ ,  $[\text{NaCN}] = 140 \times 10^{-3} \text{ M}$ , pH 7.4, 25 °C

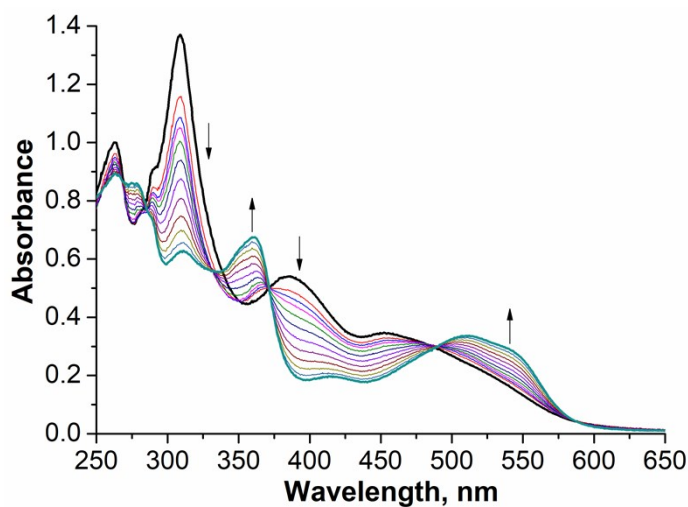

Fig. S8 UV-Vis spectral changes registered during the reaction between SO<sub>2</sub>-Cbl(II) and tert-butyl hydroperoxide (the *first step*):  $[\text{SO}_2\text{-Cbl(II)}] = 4.5 \times 10^{-5} \text{ M}$ ,  $[\text{tBuOOH}] = 1.7 \times 10^{-3} \text{ M}$ , pH 7.4, 25 °C

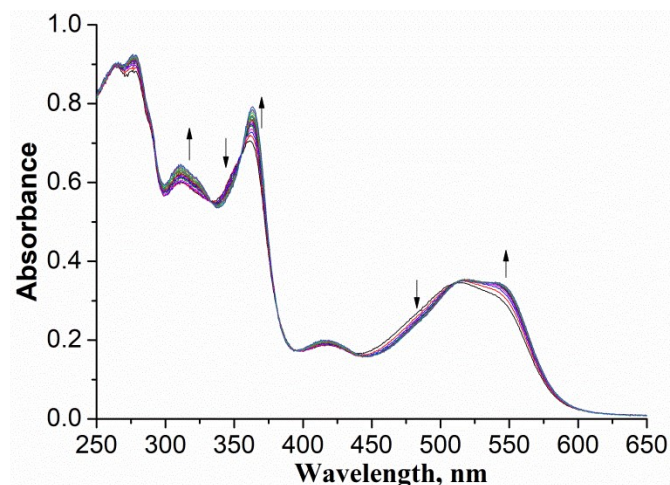

Fig. S9 UV-Vis spectral changes registered during the reaction between  $\text{SO}_2\text{-Cbl(II)}$  and tert-butyl hydroperoxide (the *second step*):  $[\text{SO}_2\text{-Cbl(II)}] = 4.5 \times 10^{-5} \text{ M}$ ,  $[\text{tBuOOH}] = 1.7 \times 10^{-3} \text{ M}$ , pH 7.4, 25 °C

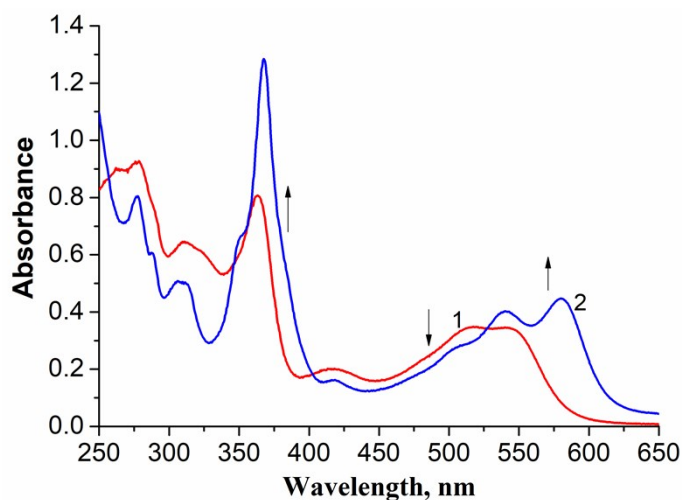

Fig. S10 UV-Vis spectral changes recorded during addition of sodium cyanide to the final product of the reaction between  $\text{SO}_2\text{-Cbl(II)}$  and  $\text{tBuOOH}$ :  $[\text{SO}_2\text{-Cbl(II)}] = 4.5 \times 10^{-5} \text{ M}$ ,  $[\text{tBuOOH}] = 1.7 \times 10^{-3} \text{ M}$ ,  $[\text{NaCN}] = 0.01 \text{ M}$ , pH 7.4, 25 °C

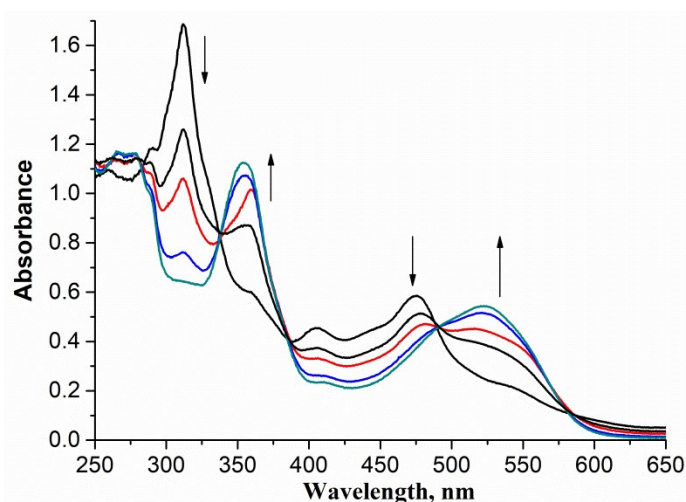

Fig. S11 UV-Vis spectral changes registered during the reaction between  $\text{Cbl(II)}$  and tert-butyl hydroperoxide:  $[\text{Cbl(II)}] = 6.0 \times 10^{-5} \text{ M}$ ,  $[\text{tBuOOH}] = 1.7 \times 10^{-3} \text{ M}$ , pH 7.4, 25 °C, anaerobic conditions

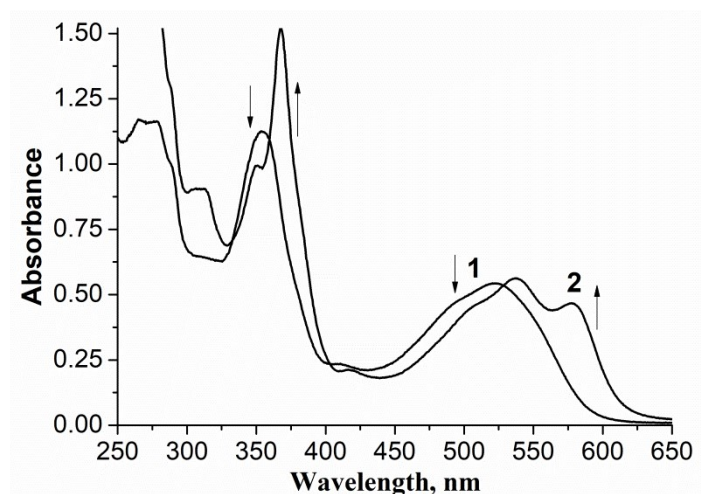

Fig. S12 UV-Vis spectra recorded before (1) and after (2) addition of sodium cyanide to the final product of the reaction between Cbl(II) and <sup>t</sup>BuOOH: [Cbl(II)] =  $4.5 \times 10^{-5}$  M, [tBuOOH] =  $1.7 \times 10^{-3}$  M, [NaCN] = 0 (1), 0.01 (2) M, pH 7.4, 25 °C, anaerobic conditions

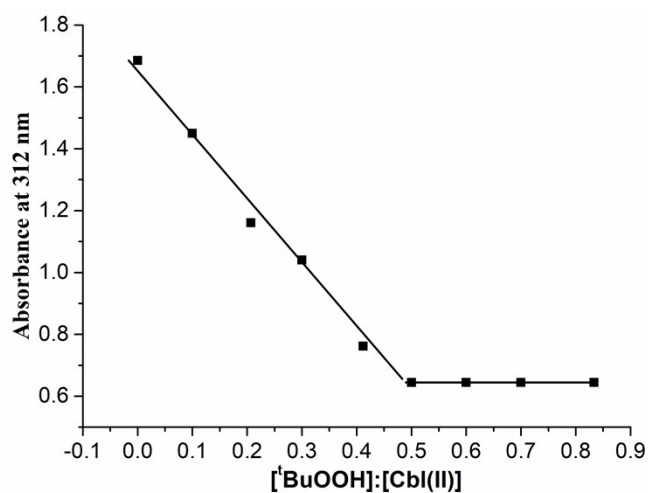

Fig. S13 Plots of absorbance at 312 nm *versus* [tBuOOH]/[Cbl(II)] in aqueous media: [Cbl(II)] =  $6 \times 10^{-5}$  M, pH 7.4, 25 °C, anaerobic conditions

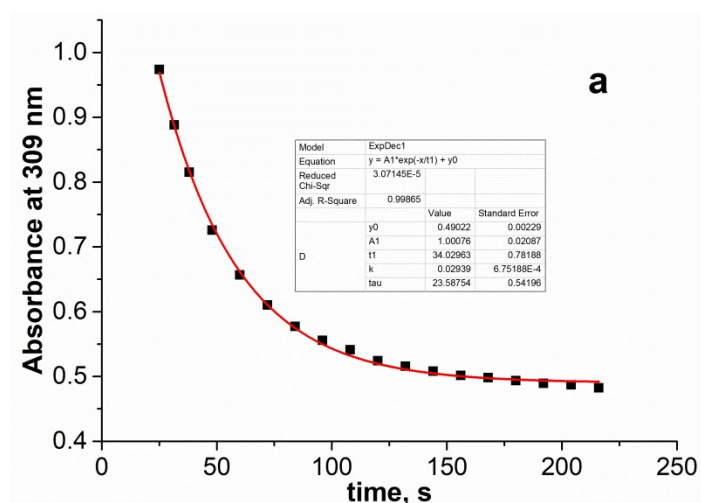



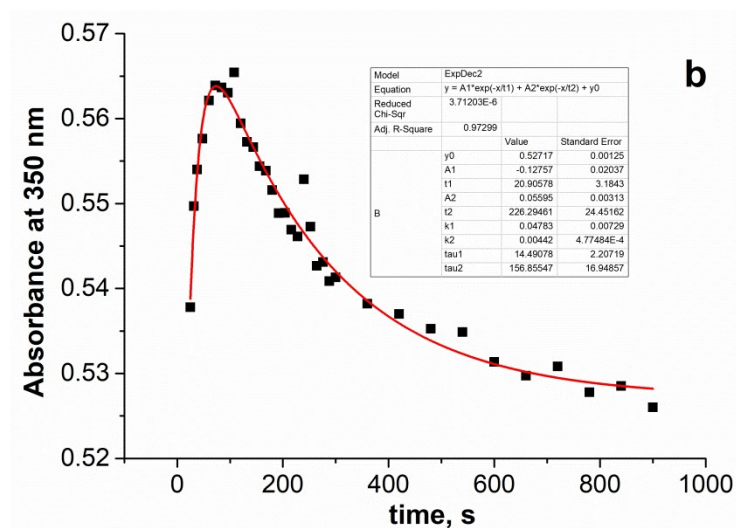

Fig. S14 Typical kinetic traces recorded at different wavelengths for the reaction of Cbl(II) with  $\text{H}_2\text{O}_2$ :  $[\text{Cbl(II)}] = 5.0 \times 10^{-5} \text{ M}$ ,  $[\text{H}_2\text{O}_2] = 0.14 \times 10^{-3} \text{ M}$ , pH 7.4, 25 °C

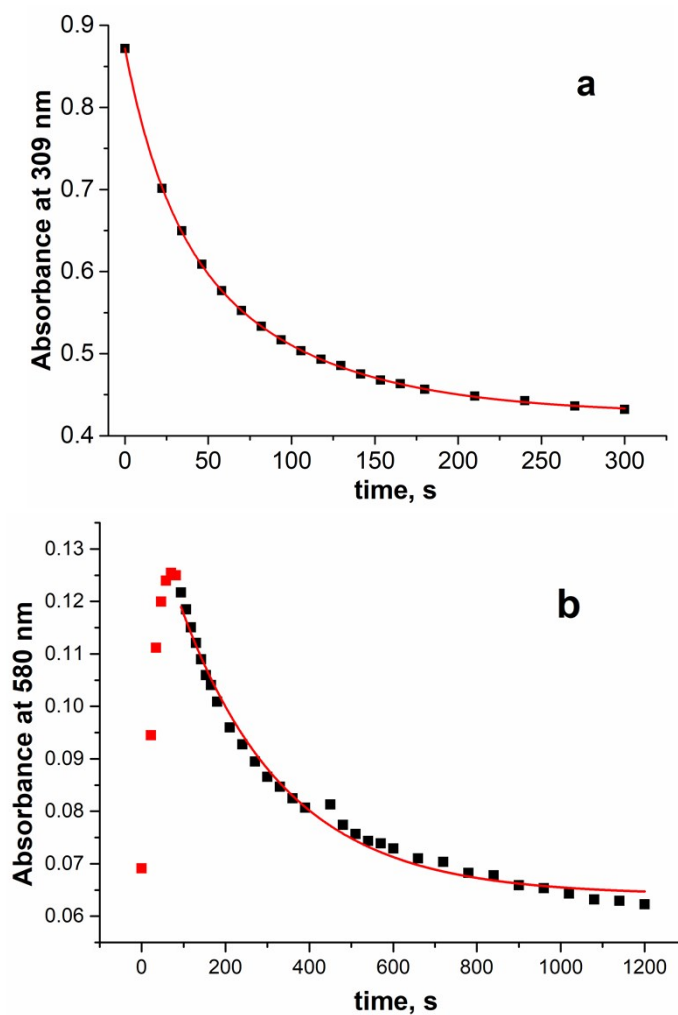

Fig. S15 Typical kinetic traces recorded at different wavelengths for the reaction of Cbi(II) with  $\text{H}_2\text{O}_2$ :  $[\text{Cbi(II)}] = 3.8 \times 10^{-5} \text{ M}$ ,  $[\text{H}_2\text{O}_2] = 0.1 \times 10^{-3} \text{ M}$ , pH 7.4, 25 °C

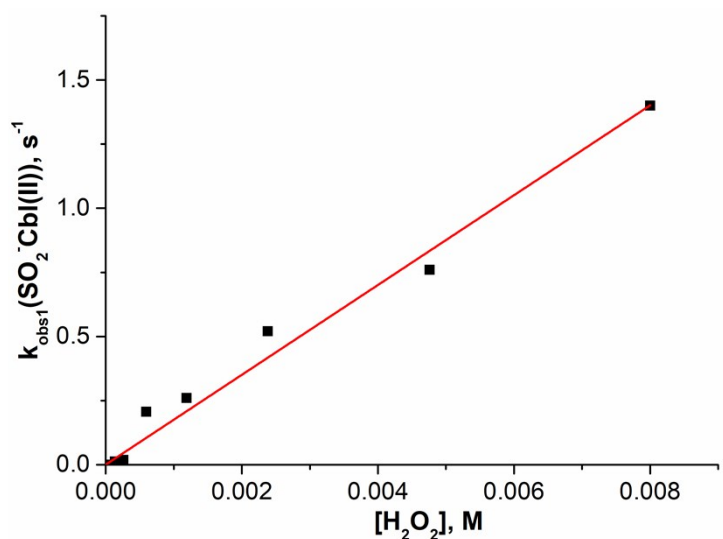

Fig. S16. Plot of  $k_{\text{obs}1}(\text{SO}_2\text{-Cbl(II)})$  vs  $[\text{H}_2\text{O}_2]$  measured for the first step of the reaction of  $\text{SO}_2\text{-Cbl(II)}$  with  $\text{H}_2\text{O}_2$ :  $[\text{SO}_2\text{-Cbl(II)}] = 5 \times 10^{-5} \text{ M}$ , pH 7.4, 25 °C

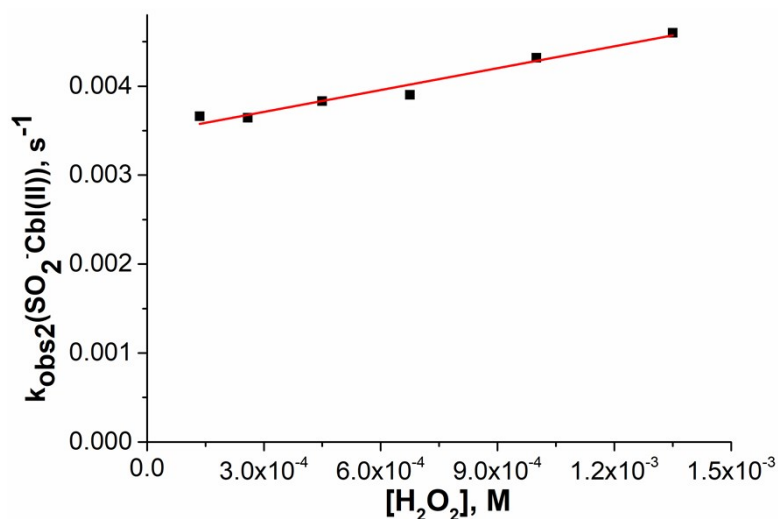

Fig. S17. Plot  $k_{\text{obs}2}(\text{SO}_2\text{-Cbl(II)})$  vs  $[\text{H}_2\text{O}_2]$ , measured for the second step of the reaction of  $\text{SO}_2\text{-Cbl(II)}$  with  $\text{H}_2\text{O}_2$ :  $[\text{SO}_2\text{-Cbl(II)}] = 5 \times 10^{-5} \text{ M}$ , pH 7.4, 25 °C, anaerobic conditions

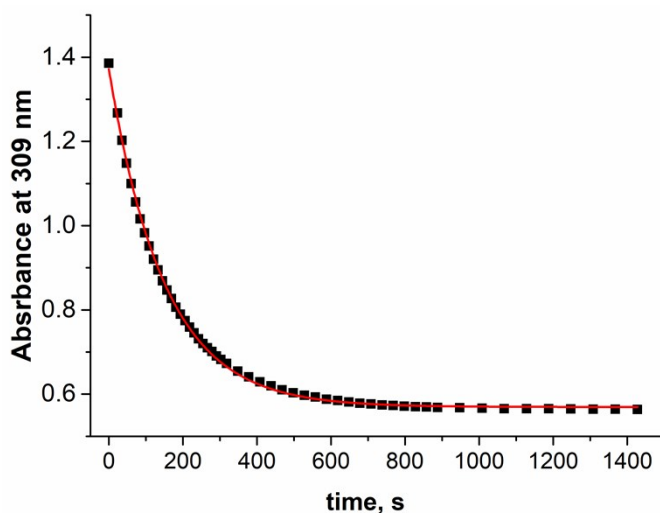

Fig. S18. Typical kinetic traces recorded for the reaction of  $\text{SO}_2\text{-Cbl(II)}$  with  $t\text{BuOOH}$ :  $[\text{SO}_2\text{-Cbl(II)}] = 5 \times 10^{-5} \text{ M}$ ,  $[t\text{BuOOH}] = 0.6 \times 10^{-3} \text{ M}$ , pH 7.4, 25 °C

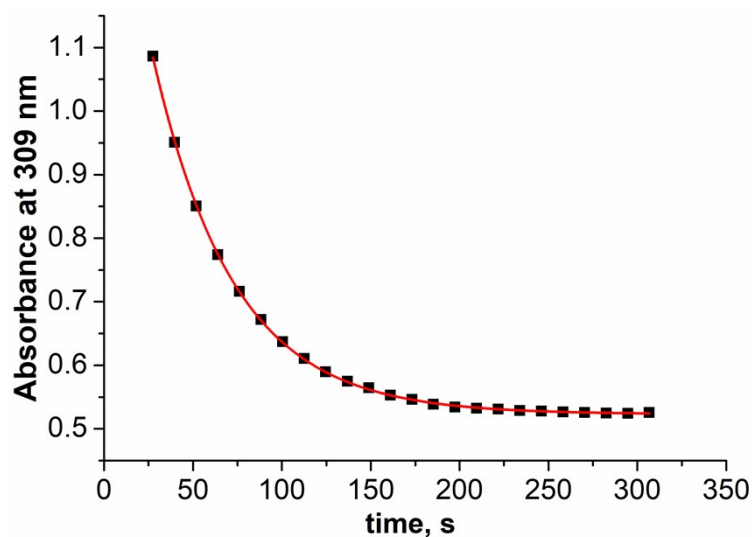

Fig. S19. Typical kinetic traces recorded for the reaction of Cbl(II) with <sup>t</sup>BuOOH: [Cbl(II)] =  $5 \times 10^{-5}$  M, [<sup>t</sup>BuOOH] =  $0.34 \times 10^{-3}$  M, pH 7.4, 25 °C

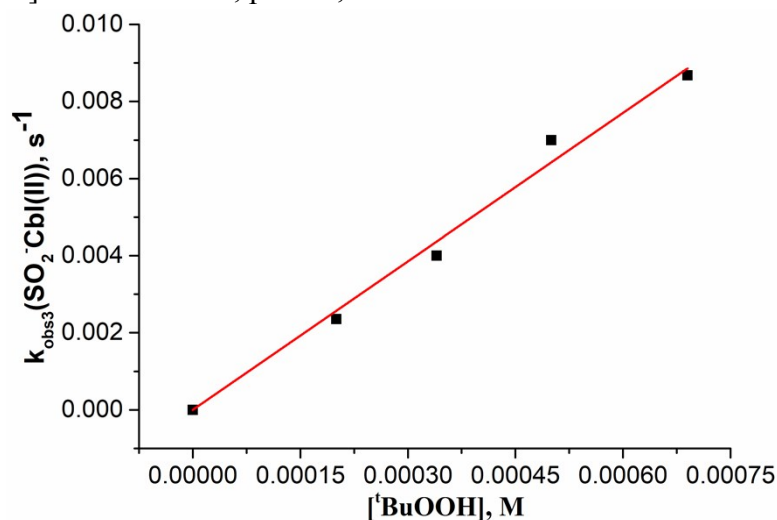

Fig. S20. Plot of  $k_{\text{obs}3}(\text{SO}_2\text{-Cbl(II)})$  versus [<sup>t</sup>BuOOH] for the reaction of  $\text{SO}_2\text{-Cbl(II)}$  with <sup>t</sup>BuOOH: [ $\text{SO}_2\text{-Cbl(II)}$ ] =  $5.0 \times 10^{-5}$  M, pH 7.4, 25 °C

**Table S1.** Extinction coefficients of corrinoids in aqueous solution at 25 °C

| Corrinoids             | Wavelength, nm                        |       |       |      |
|------------------------|---------------------------------------|-------|-------|------|
|                        | 580                                   | 367   | 348   | 313  |
|                        | Extinction coefficients, L/(mol × cm) |       |       |      |
| (CN) <sub>2</sub> Cbl  | 10000                                 | 30400 | 13000 | 9200 |
| (CN) <sub>2</sub> Cbi  | 10000                                 | 30400 | 13372 | 9535 |
| (CN) <sub>2</sub> SYC1 | 1230                                  | 3077  | 9615  | 5000 |
| (CN) <sub>2</sub> SYC2 | 600                                   | 2160  | 2400  | 9200 |
